# Supplementary material for: Bat Research Networks and Viral Surveillance: Gaps and Opportunities in Western Asia
Source: MDPI journal article supplement (doi:10.3390/v11030240), 2019-03-10
Supplement: s1 [file s1]

**Table S3: Relationship between research effort and bat species richness across 247 countries.**

Pearson's product-moment correlation coefficient ( $r$ ) was used to estimate the association between research effort and species richness (based on IUCN Red List data) for 247 countries included in our analyses (see Figures 4 - 6) (Table S4). We used package *stats* (function *cor.test*) to determine the strength and significance of the association between research effort on bats, bat-associated viruses, and bat-associated coronaviruses (by search term combinations) with species richness, then plotted using package *ggpubr* [1]. All analyses were conducted in R version 3.4.3 [2].

| Research effort*     | $r$ [95% CI]       | t-value | p-value |
|----------------------|--------------------|---------|---------|
| Bats                 | 0.45 [0.34 – 0.55] | 7.31    | < 0.001 |
| Bats & Viruses       | 0.47 [0.36 – 0.57] | 7.80    | < 0.001 |
| Bats & Coronaviruses | 0.26 [0.13 – 0.38] | 3.94    | 0.001   |

\* Research effort is based on the number of publications indexed in PubMed that included the specific search terms: Bats = ("bat" OR "bats" OR "Chiroptera"); Bats and Viruses = ( "bat" OR "bats" OR "Chiroptera") AND ("virus" OR "viruses"); Bats and Coronaviruses = ("bat" OR "bats" OR "Chiroptera") AND ("coronavirus" OR "coronaviruses"). Publication counts (see Table S4) were  $\log_{10}$ -transformed ( $\log_{10} + 1$ ) prior to analyses.

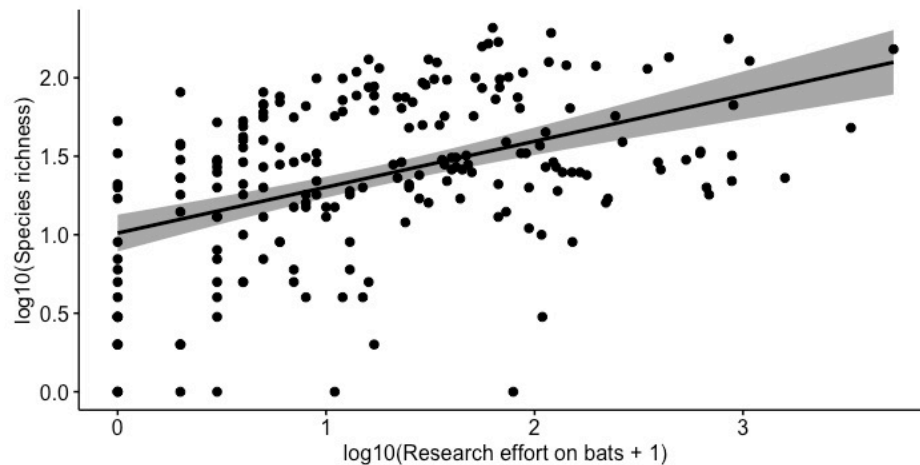

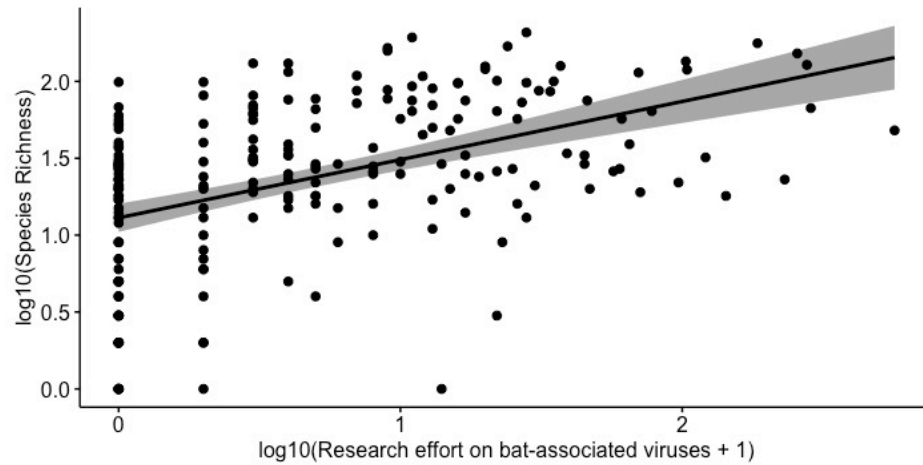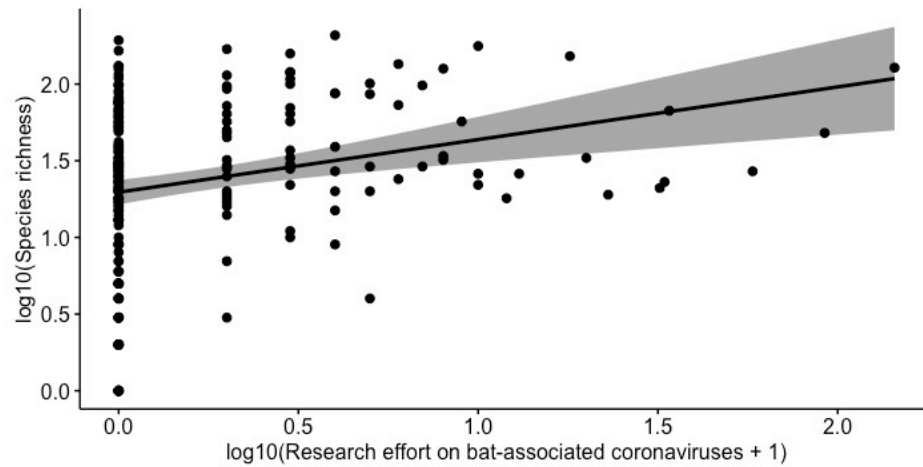

#### References:

1. Kassambara, A. ggpubr: "ggplot2" based publication ready plots. R package version 0.2; <https://CRAN.R-project.org/package=ggpubr>; **2018**.
2. R Core Team. R: a language and environment for statistical computing. R Foundation for Statistical Computing; Vienna, Austria; **2017**.
