# Supplementary material for: Bat Research Networks and Viral Surveillance: Gaps and Opportunities in Western Asia
Source: MDPI journal article supplement (doi:10.3390/v11030240), 2019-03-10
Supplement: s1 [file s1]

**Table S2: Conservation status and regional distribution of bat species native to Western Asia.**

| Bat species                     | Conservation Status | East Asia | Europe | North Africa | North Asia | Oceania | South & Southeast Asia | Sub-Saharan Africa | West & Central Asia |
|---------------------------------|---------------------|-----------|--------|--------------|------------|---------|------------------------|--------------------|---------------------|
| <b>Emballonuridae</b>           |                     |           |        |              |            |         |                        |                    |                     |
| <i>Taphozous nudiventris</i>    | LC                  |           |        | X            |            |         | X                      | X                  | X                   |
| <i>Taphozous perforatus</i>     | LC                  |           |        | X            |            |         | X                      | X                  | X                   |
| <b>Hipposideridae</b>           |                     |           |        |              |            |         |                        |                    |                     |
| <i>Asellia italosomalica</i>    | DD                  |           |        |              |            |         |                        |                    | X                   |
| <i>Asellia arabica</i>          | DD                  |           |        |              |            |         |                        | X                  | X                   |
| <i>Asellia patrizii</i>         | LC                  |           |        |              |            |         |                        | X                  | X                   |
| <i>Asellia tridens</i>          | LC                  |           |        | X            |            |         |                        | X                  | X                   |
| <i>Hipposideros caffer</i>      | LC                  |           |        | X            |            |         |                        | X                  | X                   |
| <i>Hipposideros cineraceus</i>  | LC                  |           |        |              |            |         | X                      |                    | X                   |
| <i>Hipposideros fulvus</i>      | LC                  | X         |        |              |            |         | X                      |                    | X                   |
| <i>Hipposideros megalotis</i>   | LC                  |           |        |              |            |         |                        | X                  | X                   |
| <i>Hipposideros tephurus</i>    | LC                  |           |        | X            |            |         |                        | X                  | X                   |
| <i>Triaenops parvus</i>         | DD                  |           |        |              |            |         |                        |                    | X                   |
| <i>Triaenops persicus</i>       | LC                  |           |        |              |            |         |                        | X                  | X                   |
| <b>Megadermatidae</b>           |                     |           |        |              |            |         |                        |                    |                     |
| <i>Megaderma lyra</i>           | LC                  | X         |        |              |            |         | X                      |                    | X                   |
| <b>Miniopteridae</b>            |                     |           |        |              |            |         |                        |                    |                     |
| <i>Miniopterus natalensis</i>   | LC                  |           |        |              |            |         |                        | X                  | X                   |
| <i>Miniopterus schreibersii</i> | NT                  |           | X      | X            | X          |         |                        | X                  | X                   |
| <b>Molossidae</b>               |                     |           |        |              |            |         |                        |                    |                     |
| <i>Chaerephon pumilus</i>       | LC                  |           |        |              |            |         |                        | X                  | X                   |
| <i>Mops midas</i>               | LC                  |           |        |              |            |         |                        | X                  | X                   |

| Bat species                      | Conservation Status | East Asia | Europe | North Africa | North Asia | Oceania | South & Southeast Asia | Sub-Saharan Africa | West & Central Asia |
|----------------------------------|---------------------|-----------|--------|--------------|------------|---------|------------------------|--------------------|---------------------|
| <i>Otomops harrisoni</i>         | VU                  |           |        |              |            |         |                        | X                  | X                   |
| <i>Tadarida aegyptiaca</i>       | LC                  |           |        | X            |            |         | X                      | X                  | X                   |
| <i>Tadarida teniotis</i>         | LC                  |           | X      | X            | X          |         | X                      |                    | X                   |
| <b>Nycteridae</b>                |                     |           |        |              |            |         |                        |                    |                     |
| <i>Nycteris thebaica</i>         | LC                  |           |        | X            |            |         |                        | X                  | X                   |
| <b>Pteropodidae</b>              |                     |           |        |              |            |         |                        |                    |                     |
| <i>Cynopterus sphinx</i>         | LC                  | X         |        |              |            |         | X                      |                    | X                   |
| <i>Eidolon helvum</i>            | NT                  |           |        |              |            |         |                        | X                  | X                   |
| <i>Pteropus giganteus</i>        | LC                  | X         |        |              |            |         | X                      |                    | X                   |
| <i>Rousettus aegyptiacus</i>     | LC                  |           | X      | X            |            |         |                        | X                  | X                   |
| <i>Rousettus leschenaultii</i>   | LC                  | X         |        |              |            |         | X                      |                    | X                   |
| <b>Rhinolophidae</b>             |                     |           |        |              |            |         |                        |                    |                     |
| <i>Rhinolophus blasii</i>        | LC                  |           | X      | X            |            |         |                        | X                  | X                   |
| <i>Rhinolophus bocharicus</i>    | LC                  |           |        |              |            |         |                        |                    | X                   |
| <i>Rhinolophus clivosus</i>      | LC                  |           |        | X            |            |         |                        | X                  | X                   |
| <i>Rhinolophus euryale</i>       | NT                  |           | X      | X            | X          |         |                        |                    | X                   |
| <i>Rhinolophus ferrumequinum</i> | LC                  | X         | X      | X            | X          |         | X                      |                    | X                   |
| <i>Rhinolophus hipposideros</i>  | LC                  | X         | X      | X            | X          |         | X                      | X                  | X                   |
| <i>Rhinolophus lepidus</i>       | LC                  | X         |        |              |            |         | X                      |                    | X                   |
| <i>Rhinolophus macrotis</i>      | LC                  | X         |        |              |            |         | X                      |                    | X                   |
| <i>Rhinolophus mehelyi</i>       | VU                  |           | X      | X            | X          |         |                        |                    | X                   |
| <b>Rhinopomatidae</b>            |                     |           |        |              |            |         |                        |                    |                     |
| <i>Rhinopoma cystops</i>         | LC                  |           |        | X            |            |         |                        | X                  | X                   |
| <i>Rhinopoma hadramauticum</i>   | EN                  |           |        |              |            |         |                        |                    | X                   |
| <i>Rhinopoma hardwickii</i>      | LC                  |           |        | X            |            |         | X                      | X                  | X                   |

| Bat species                     | Conservation Status | East Asia | Europe | North Africa | North Asia | Oceania | South & Southeast Asia | Sub-Saharan Africa | West & Central Asia |
|---------------------------------|---------------------|-----------|--------|--------------|------------|---------|------------------------|--------------------|---------------------|
| <i>Rhinopoma microphyllum</i>   | LC                  |           |        | X            |            |         | X                      | X                  | X                   |
| <i>Rhinopoma muscatellum</i>    | LC                  |           |        |              |            |         | X                      |                    | X                   |
| <b>Vespertilionidae</b>         |                     |           |        |              |            |         |                        |                    |                     |
| <i>Barbastella barbastellus</i> | NT                  |           | X      | X            | X          |         |                        |                    | X                   |
| <i>Barbastella leucomelas</i>   | LC                  | X         |        | X            | X          |         | X                      | X                  | X                   |
| <i>Eptesicus bottae</i>         | LC                  |           | X      | X            |            |         | X                      |                    | X                   |
| <i>Eptesicus gobiensis</i>      | LC                  | X         |        |              | X          |         | X                      |                    | X                   |
| <i>Eptesicus nasutus</i>        | LC                  |           |        |              |            |         |                        |                    | X                   |
| <i>Eptesicus nilssoni</i>       | LC                  | X         | X      |              | X          |         |                        |                    | X                   |
| <i>Eptesicus serotinus</i>      | LC                  | X         | X      | X            | X          |         | X                      |                    | X                   |
| <i>Hypsugo savii</i>            | LC                  | X         | X      | X            | X          |         | X                      |                    | X                   |
| <i>Murina huttoni</i>           | LC                  | X         |        |              |            |         | X                      |                    | X                   |
| <i>Murina tubinaris</i>         | LC                  |           |        |              |            |         | X                      |                    | X                   |
| <i>Myotis aurascens</i>         | LC                  | X         | X      |              | X          |         |                        |                    | X                   |
| <i>Myotis bechsteinii</i>       | NT                  |           | X      |              | X          |         |                        |                    | X                   |
| <i>Myotis blythii</i>           | LC                  | X         | X      | X            | X          |         | X                      | X                  | X                   |
| <i>Myotis bocagii</i>           | LC                  |           |        |              |            |         |                        | X                  | X                   |
| <i>Myotis brandtii</i>          | LC                  | X         | X      |              | X          |         |                        |                    | X                   |
| <i>Myotis bucharensis</i>       | DD                  |           |        |              |            |         |                        |                    | X                   |
| <i>Myotis capaccinii</i>        | VU                  |           | X      | X            |            |         |                        |                    | X                   |
| <i>Myotis daubentonii</i>       | LC                  | X         | X      |              | X          |         | X                      |                    | X                   |
| <i>Myotis emarginatus</i>       | LC                  |           | X      | X            | X          |         |                        |                    | X                   |
| <i>Myotis formosus</i>          | LC                  | X         |        |              |            |         | X                      |                    | X                   |
| <i>Myotis hajastanicus</i>      | CR                  |           |        |              |            |         |                        |                    | X                   |
| <i>Myotis longipes</i>          | DD                  | X         |        |              |            |         | X                      |                    | X                   |

| Bat species                      | Conservation Status | East Asia | Europe | North Africa | North Asia | Oceania | South & Southeast Asia | Sub-Saharan Africa | West & Central Asia |
|----------------------------------|---------------------|-----------|--------|--------------|------------|---------|------------------------|--------------------|---------------------|
| <i>Myotis muricola</i>           | LC                  | X         |        |              |            |         | X                      |                    | X                   |
| <i>Myotis myotis</i>             | LC                  |           | X      |              | X          |         |                        |                    | X                   |
| <i>Myotis mystacinus</i>         | LC                  | X         | X      | X            | X          |         |                        |                    | X                   |
| <i>Myotis nattereri</i>          | LC                  |           | X      | X            | X          |         |                        |                    | X                   |
| <i>Myotis nipalensis</i>         | LC                  | X         |        |              |            |         | X                      |                    | X                   |
| <i>Myotis schaubi</i>            | DD                  |           | X      |              |            |         |                        |                    | X                   |
| <i>Nyctalus lasiopterus</i>      | VU                  |           | X      | X            | X          |         |                        |                    | X                   |
| <i>Nyctalus leisleri</i>         | LC                  | X         | X      | X            | X          |         | X                      |                    | X                   |
| <i>Nyctalus montanus</i>         | LC                  |           |        |              |            |         | X                      |                    | X                   |
| <i>Nyctalus noctule</i>          | LC                  | X         | X      | X            | X          |         | X                      |                    | X                   |
| <i>Nycticeinops schlieffeni</i>  | LC                  |           |        | X            |            |         |                        | X                  | X                   |
| <i>Otonycteris hemprichii</i>    | LC                  |           |        | X            |            |         | X                      | X                  | X                   |
| <i>Otonycteris leucophaea</i>    | DD                  |           |        |              |            |         |                        |                    | X                   |
| <i>Pipistrellus arabicus</i>     | DD                  |           |        |              |            |         |                        |                    | X                   |
| <i>Pipistrellus ariel</i>        | DD                  |           |        | X            |            |         |                        | X                  | X                   |
| <i>Pipistrellus ceylonicus</i>   | LC                  | X         |        |              |            |         | X                      |                    | X                   |
| <i>Pipistrellus coromandra</i>   | LC                  | X         |        |              |            |         | X                      |                    | X                   |
| <i>Pipistrellus javanicus</i>    | LC                  | X         |        |              |            |         | X                      |                    | X                   |
| <i>Pipistrellus kuhlii</i>       | LC                  |           | X      | X            | X          |         | X                      | X                  | X                   |
| <i>Pipistrellus nathusii</i>     | LC                  |           | X      |              | X          |         |                        |                    | X                   |
| <i>Pipistrellus pipistrellus</i> | LC                  | X         | X      | X            | X          |         | X                      |                    | X                   |
| <i>Pipistrellus pygmaeus</i>     | LC                  |           | X      |              | X          |         |                        |                    | X                   |
| <i>Pipistrellus rueppellii</i>   | LC                  |           |        | X            |            |         |                        | X                  | X                   |
| <i>Pipistrellus tenuis</i>       | LC                  | X         |        |              |            | X       | X                      |                    | X                   |
| <i>Plecotus auratus</i>          | LC                  |           | X      |              | X          |         |                        |                    | X                   |

| Bat species                   | Conservation Status | East Asia | Europe | North Africa | North Asia | Oceania | South & Southeast Asia | Sub-Saharan Africa | West & Central Asia |
|-------------------------------|---------------------|-----------|--------|--------------|------------|---------|------------------------|--------------------|---------------------|
| <i>Plecotus austriacus</i>    | LC                  |           | X      |              | X          |         |                        | X                  | X                   |
| <i>Plecotus kolombatovici</i> | LC                  |           | X      | X            |            |         |                        |                    | X                   |
| <i>Plecotus macrobullaris</i> | LC                  |           | X      |              | X          |         |                        |                    | X                   |
| <i>Scotoecus pallidus</i>     | LC                  |           |        |              |            |         | X                      |                    | X                   |
| <i>Scotophilus heathi</i>     | LC                  | X         |        |              |            |         | X                      |                    | X                   |
| <i>Scotophilus kuhlii</i>     | LC                  | X         |        |              |            |         | X                      |                    | X                   |
| <i>Scotozous dormer</i>       | LC                  |           |        |              |            |         | X                      |                    | X                   |
| <i>Vespertilio murinus</i>    | LC                  | X         | X      |              | X          |         |                        |                    | X                   |

The conservation status (CR = critically endangered, EN = endangered; VU = vulnerable; NT = near threatened; LC = least concern; DD = data deficient) and distribution by region for bat species of Western Asia is based on data available from the International Union for Conservation of Nature (IUCN) Red List of Threatened Species (<https://www.iucnredlist.org/>), downloaded February 5, 2019.
