# Supplementary material for: Bat Research Networks and Viral Surveillance: Gaps and Opportunities in Western Asia
Source: MDPI journal article supplement (doi:10.3390/v11030240), 2019-03-10
Supplement: s1 [file s1]

**Table S4: Research effort on bats and associated viruses by country.**

| Country                | Research Effort by Search Terms* |                  |                        |
|------------------------|----------------------------------|------------------|------------------------|
|                        | Bats                             | Bats and Viruses | Bats and Coronaviruses |
| Afghanistan            | 1                                | 0                | 0                      |
| Åland Islands          | 0                                | 0                | 0                      |
| Albania                | 2                                | 0                | 0                      |
| Algeria                | 28                               | 1                | 0                      |
| American Samoa         | 2                                | 0                | 0                      |
| Andorra                | 1                                | 0                | 0                      |
| Angola                 | 5                                | 3                | 0                      |
| Anguilla               | 6                                | 0                | 0                      |
| Antarctica             | 20                               | 5                | 0                      |
| Antigua and Barbuda    | 14                               | 2                | 0                      |
| Argentina              | 149                              | 22               | 0                      |
| Armenia                | 22                               | 0                | 0                      |
| Aruba                  | 0                                | 0                | 0                      |
| Australia              | 906                              | 287              | 34                     |
| Austria                | 155                              | 10               | 0                      |
| Azerbaijan             | 2                                | 0                | 0                      |
| Bahamas                | 5                                | 0                | 0                      |
| Bahrain                | 1                                | 1                | 0                      |
| Bangladesh             | 96                               | 79               | 2                      |
| Barbados               | 2                                | 1                | 0                      |
| Belarus                | 26                               | 0                | 0                      |
| Belgium                | 673                              | 47               | 3                      |
| Belize                 | 16                               | 4                | 0                      |
| Benin                  | 11                               | 2                | 0                      |
| Bermuda                | 10                               | 0                | 0                      |
| Bhutan                 | 0                                | 0                | 0                      |
| Bolivia                | 30                               | 3                | 0                      |
| Bosnia-Herzegovina     | 7                                | 0                | 0                      |
| Botswana               | 3                                | 2                | 0                      |
| Bouvet Island          | 0                                | 0                | 0                      |
| Brazil                 | 913                              | 194              | 9                      |
| British Virgin Islands | 0                                | 0                | 0                      |
| Brunei Darussalam      | 4                                | 0                | 0                      |
| Bulgaria               | 37                               | 2                | 2                      |
| Burkina Faso           | 5                                | 0                | 0                      |
| Burundi                | 3                                | 0                | 0                      |
| Cambodia               | 0                                | 0                | 0                      |
| Cameroon               | 40                               | 17               | 2                      |
| Canada                 | 894                              | 98               | 10                     |
| Cape Verde             | 1                                | 1                | 0                      |

| Country                      | Research Effort by Search Terms* |                  |                        |
|------------------------------|----------------------------------|------------------|------------------------|
|                              | Bats                             | Bats and Viruses | Bats and Coronaviruses |
| Cayman Islands               | 0                                | 0                | 0                      |
| Central African Republic     | 4                                | 1                | 0                      |
| Chad                         | 4                                | 0                | 0                      |
| Chile                        | 72                               | 16               | 1                      |
| China                        | 1096                             | 280              | 146                    |
| Christmas Island             | 5                                | 1                | 0                      |
| Cocos Islands                | 0                                | 0                | 0                      |
| Colombia                     | 121                              | 10               | 0                      |
| Comoros                      | 16                               | 3                | 0                      |
| Congo                        | 27                               | 14               | 0                      |
| Cook Islands                 | 2                                | 0                | 0                      |
| Costa Rica                   | 88                               | 11               | 2                      |
| Cote d'Ivoire                | 30                               | 12               | 0                      |
| Croatia                      | 41                               | 2                | 0                      |
| Cuba                         | 49                               | 7                | 0                      |
| Curacao                      | 0                                | 0                | 0                      |
| Cyprus                       | 29                               | 0                | 0                      |
| Czech Republic               | 168                              | 16               | 1                      |
| Democratic Republic of Congo | 16                               | 9                | 0                      |
| Denmark                      | 219                              | 25               | 1                      |
| Djibouti                     | 0                                | 0                | 0                      |
| Dominica                     | 2                                | 1                | 0                      |
| Dominican Republic           | 12                               | 3                | 1                      |
| Ecuador                      | 57                               | 8                | 2                      |
| Egypt                        | 103                              | 21               | 5                      |
| El Salvador                  | 0                                | 0                | 0                      |
| Equatorial Guinea            | 3                                | 1                | 0                      |
| Eritrea                      | 2                                | 0                | 0                      |
| Estonia                      | 25                               | 0                | 0                      |
| Ethiopia                     | 21                               | 10               | 0                      |
| Faroe Islands                | 0                                | 0                | 0                      |
| Fiji                         | 6                                | 1                | 0                      |
| Finland                      | 153                              | 22               | 0                      |
| France                       | 5301                             | 257              | 18                     |
| French Guiana                | 32                               | 14               | 0                      |
| French Polynesia             | 4                                | 0                | 0                      |
| French Southern Territories  | 0                                | 0                | 0                      |
| Gabon                        | 50                               | 25               | 2                      |
| Gambia                       | 3                                | 2                | 0                      |
| Georgia                      | 9                                | 1                | 0                      |
| Germany                      | 1618                             | 233              | 32                     |
| Ghana                        | 59                               | 36               | 5                      |

| Country                          | Research Effort by Search Terms* |                  |                        |
|----------------------------------|----------------------------------|------------------|------------------------|
|                                  | Bats                             | Bats and Viruses | Bats and Coronaviruses |
| Gibraltar                        | 6                                | 1                | 0                      |
| Greece                           | 92                               | 3                | 0                      |
| Greenland                        | 4                                | 1                | 0                      |
| Grenada                          | 7                                | 5                | 0                      |
| Guadeloupe                       | 6                                | 1                | 0                      |
| Guam                             | 17                               | 1                | 0                      |
| Guatemala                        | 33                               | 15               | 0                      |
| Guernsey                         | 0                                | 0                | 0                      |
| Guinea-Bissau                    | 1                                | 1                | 0                      |
| Guinea                           | 263                              | 64               | 3                      |
| Guyana                           | 15                               | 2                | 0                      |
| Haiti                            | 8                                | 4                | 0                      |
| Heard Island                     | 0                                | 0                | 0                      |
| Holy See (Vatican City)          | 564                              | 564              | 0                      |
| Honduras                         | 9                                | 1                | 0                      |
| Hong Kong                        | 114                              | 60               | 59                     |
| Hungary                          | 130                              | 24               | 3                      |
| Iceland                          | 2                                | 0                | 0                      |
| India                            | 354                              | 69               | 1                      |
| Indonesia                        | 63                               | 27               | 3                      |
| Iran                             | 76                               | 4                | 0                      |
| Iraq                             | 8                                | 2                | 0                      |
| Ireland                          | 2                                | 0                | 0                      |
| Isle of Man                      | 0                                | 0                | 0                      |
| Israel                           | 533                              | 9                | 0                      |
| Italy                            | 638                              | 45               | 19                     |
| Jamaica                          | 14                               | 2                | 0                      |
| Japan                            | 900                              | 122              | 7                      |
| Jersey                           | 80                               | 13               | 0                      |
| Jordan                           | 44                               | 21               | 9                      |
| Kazakhstan                       | 8                                | 5                | 1                      |
| Kenya                            | 69                               | 28               | 6                      |
| Kiribati                         | 0                                | 0                | 0                      |
| Kuwait                           | 4                                | 1                | 1                      |
| Kyrgyzstan                       | 7                                | 7                | 0                      |
| Lao People's Democratic Republic | 20                               | 7                | 3                      |
| Latvia                           | 10                               | 0                | 0                      |
| Lebanon                          | 37                               | 4                | 2                      |
| Lesotho                          | 2                                | 2                | 0                      |
| Liberia                          | 7                                | 4                | 0                      |
| Libya                            | 1                                | 0                | 0                      |
| Liechtenstein                    | 1                                | 0                | 0                      |

| Country                  | Research Effort by Search Terms* |                  |                        |
|--------------------------|----------------------------------|------------------|------------------------|
|                          | Bats                             | Bats and Viruses | Bats and Coronaviruses |
| Lithuania                | 33                               | 4                | 0                      |
| Luxembourg               | 12                               | 2                | 1                      |
| Macao                    | 2                                | 1                | 1                      |
| Macedonia                | 4                                | 0                | 0                      |
| Madagascar               | 87                               | 16               | 2                      |
| Malawi                   | 4                                | 0                | 0                      |
| Malaysia                 | 200                              | 104              | 2                      |
| Maldives                 | 0                                | 0                | 0                      |
| Mali                     | 3                                | 1                | 0                      |
| Malta                    | 2                                | 0                | 0                      |
| Malvinas                 | 0                                | 0                | 0                      |
| Marshall Islands         | 0                                | 0                | 0                      |
| Martinique               | 4                                | 0                | 0                      |
| Mauritania               | 1                                | 0                | 0                      |
| Mauritius                | 7                                | 1                | 0                      |
| Mayotte                  | 5                                | 2                | 0                      |
| Mexico                   | 445                              | 102              | 5                      |
| Micronesia               | 3                                | 0                | 0                      |
| Moldova                  | 3                                | 0                | 0                      |
| Monaco                   | 26                               | 1                | 0                      |
| Mongolia                 | 9                                | 0                | 0                      |
| Montenegro               | 6                                | 0                | 0                      |
| Montserrat               | 3                                | 1                | 0                      |
| Morocco                  | 41                               | 4                | 0                      |
| Mozambique               | 11                               | 6                | 1                      |
| Myanmar                  | 13                               | 6                | 0                      |
| Namibia                  | 5                                | 3                | 0                      |
| Nauru                    | 0                                | 0                | 0                      |
| Nepal                    | 4                                | 2                | 0                      |
| Netherlands              | 430                              | 56               | 12                     |
| New Caledonia            | 12                               | 1                | 0                      |
| New Zealand              | 112                              | 22               | 1                      |
| Nicaragua                | 11                               | 0                | 0                      |
| Niger                    | 6                                | 0                | 0                      |
| Nigeria                  | 67                               | 30               | 3                      |
| Niue                     | 0                                | 0                | 0                      |
| Norfolk Island           | 0                                | 0                | 0                      |
| North Korea              | 1                                | 0                | 0                      |
| Northern Mariana Islands | 0                                | 0                | 0                      |
| Norway                   | 94                               | 13               | 2                      |
| Oman                     | 10                               | 3                | 3                      |
| Pakistan                 | 37                               | 4                | 1                      |

| Country               | Research Effort by Search Terms* |                  |                        |
|-----------------------|----------------------------------|------------------|------------------------|
|                       | Bats                             | Bats and Viruses | Bats and Coronaviruses |
| Palau                 | 1                                | 0                | 0                      |
| Palestine             | 1                                | 0                | 0                      |
| Panama                | 143                              | 19               | 2                      |
| Papua New Guinea      | 16                               | 8                | 0                      |
| Paraguay              | 16                               | 2                | 0                      |
| Peru                  | 67                               | 23               | 1                      |
| Philippines           | 65                               | 26               | 5                      |
| Pitcairn              | 0                                | 0                | 0                      |
| Poland                | 181                              | 18               | 5                      |
| Portugal              | 0                                | 0                | 0                      |
| Puerto Rico           | 68                               | 27               | 0                      |
| Qatar                 | 11                               | 4                | 4                      |
| Reunion               | 40                               | 12               | 1                      |
| Romania               | 41                               | 2                | 0                      |
| Russia                | 117                              | 11               | 1                      |
| Rwanda                | 6                                | 0                | 0                      |
| Saint Barthelemy      | 0                                | 0                | 0                      |
| Saint Helena          | 1                                | 0                | 0                      |
| Saint Kitts and Nevis | 3                                | 1                | 0                      |
| Saint Lucia           | 0                                | 0                | 0                      |
| Saint Pierre          | 8                                | 0                | 0                      |
| Saint Vincent         | 4                                | 0                | 0                      |
| Samoa                 | 2                                | 0                | 0                      |
| San Marino            | 0                                | 0                | 0                      |
| Sao Tome and Principe | 5                                | 0                | 0                      |
| Saudi Arabia          | 67                               | 29               | 32                     |
| Senegal               | 30                               | 14               | 0                      |
| Serbia and Montenegro | 49                               | 2                | 1                      |
| Seychelles            | 3                                | 0                | 0                      |
| Sierra Leone          | 10                               | 9                | 0                      |
| Singapore             | 133                              | 74               | 24                     |
| Sint Maarten          | 0                                | 0                | 0                      |
| Slovakia              | 44                               | 7                | 0                      |
| Slovenia              | 37                               | 7                | 2                      |
| Solomon Islands       | 1                                | 0                | 0                      |
| Somalia               | 1                                | 0                | 0                      |
| South Africa          | 245                              | 60               | 8                      |
| South Korea           | 41                               | 3                | 2                      |
| South Sudan           | 4                                | 2                | 0                      |
| Spain                 | 639                              | 39               | 7                      |
| Sri Lanka             | 24                               | 4                | 1                      |
| Sudan                 | 24                               | 14               | 1                      |

| Country                   | Research Effort by Search Terms* |                  |                        |
|---------------------------|----------------------------------|------------------|------------------------|
|                           | Bats                             | Bats and Viruses | Bats and Coronaviruses |
| Suriname                  | 17                               | 3                | 0                      |
| Svalbard                  | 0                                | 0                | 0                      |
| Swaziland                 | 8                                | 3                | 0                      |
| Sweden                    | 226                              | 12               | 0                      |
| Switzerland               | 400                              | 46               | 6                      |
| Syrian Arab Republic      | 3                                | 1                | 0                      |
| Taiwan                    | 129                              | 13               | 4                      |
| Tajikistan                | 7                                | 4                | 0                      |
| Tanzania                  | 30                               | 10               | 1                      |
| Thailand                  | 120                              | 36               | 8                      |
| Timor-Leste               | 1                                | 1                | 0                      |
| Togo                      | 4                                | 2                | 0                      |
| Tokelau                   | 0                                | 0                | 0                      |
| Tonga                     | 1                                | 1                | 0                      |
| Trinidad and Tobago       | 49                               | 17               | 1                      |
| Tunisia                   | 43                               | 3                | 1                      |
| Turkey                    | 110                              | 7                | 2                      |
| Turkmenistan              | 0                                | 0                | 0                      |
| Turks and Caicos Islands  | 0                                | 0                | 0                      |
| Tuvalu                    | 0                                | 0                | 0                      |
| Uganda                    | 52                               | 35               | 2                      |
| Ukraine                   | 51                               | 4                | 1                      |
| United Arab Emirates      | 13                               | 5                | 3                      |
| United Kingdom            | 700                              | 145              | 11                     |
| US Minor Outlying Islands | 0                                | 0                | 0                      |
| United States of America  | 5465                             | 846              | 129                    |
| Uruguay                   | 21                               | 3                | 0                      |
| Uzbekistan                | 3                                | 0                | 0                      |
| Vanuatu                   | 5                                | 0                | 0                      |
| Venezuela                 | 60                               | 8                | 0                      |
| Vietnam                   | 78                               | 22               | 4                      |
| Virgin Islands            | 0                                | 0                | 0                      |
| Wallis and Futuna         | 0                                | 0                | 0                      |
| Western Sahara            | 0                                | 0                | 0                      |
| Yemen                     | 5                                | 0                | 0                      |
| Zambia                    | 24                               | 17               | 0                      |
| Zimbabwe                  | 22                               | 10               | 1                      |

\* Research effort is based on the number of publications by indexed in PubMed that included the specific search terms per country: Bats = ("bat" OR "bats" OR "Chiroptera"); Bats and Viruses = ("bat" OR "bats" OR "Chiroptera") AND ("virus" OR "viruses"); Bats and Coronaviruses = ("bat" OR "bats" OR "Chiroptera") AND ("coronavirus" OR "coronaviruses").
