# Supplementary material for: Bat Research Networks and Viral Surveillance: Gaps and Opportunities in Western Asia
Source: MDPI journal article supplement (doi:10.3390/v11030240), 2019-03-10
Supplement: s1 [file s1]

**Table S1: Bat species native to Western Asia.**

| Bat species                     | AFG | ARM | AZE | BHR | GEO | IRN | IRQ | ISR | JOR | KWT | LBN | OMN | PAK | PSE | QAT | SAU | SYR | TUR | ARE | YEM |
|---------------------------------|-----|-----|-----|-----|-----|-----|-----|-----|-----|-----|-----|-----|-----|-----|-----|-----|-----|-----|-----|-----|
| <b>Emballonuridae</b>           |     |     |     |     |     |     |     |     |     |     |     |     |     |     |     |     |     |     |     |     |
| <i>Taphozous nudiventris</i>    | X   |     |     |     |     | X   | X   | X   | X   |     |     |     | X   | X   |     | X   | X   | X   | X   | X   |
| <i>Taphozous perforatus</i>     |     |     |     |     |     | X   |     | X   |     |     |     | X   | X   |     |     | X   |     |     |     | X   |
| <b>Hipposideridae</b>           |     |     |     |     |     |     |     |     |     |     |     |     |     |     |     |     |     |     |     |     |
| <i>Asellia italosomalica</i>    |     |     |     |     |     |     |     |     |     |     |     | X   |     |     |     |     |     |     |     | X   |
| <i>Asellia arabica</i>          |     |     |     |     |     |     |     |     |     |     |     |     |     |     |     |     |     |     |     | X   |
| <i>Asellia patrizii</i>         |     |     |     |     |     |     |     |     |     |     |     |     |     |     |     | X   |     |     |     |     |
| <i>Asellia tridens</i>          | X   |     |     |     |     | X   |     | X   |     |     |     | X   | X   |     |     | X   | X   |     |     | X   |
| <i>Hipposideros caffer</i>      |     |     |     |     |     |     |     |     |     |     |     |     |     |     |     | X   |     |     |     | X   |
| <i>Hipposideros cineraceus</i>  |     |     |     |     |     |     |     |     |     |     |     |     | X   |     |     |     |     |     |     |     |
| <i>Hipposideros fulvus</i>      | X   |     |     |     |     |     |     |     |     |     |     |     | X   |     |     |     |     |     |     |     |
| <i>Hipposideros megalotis</i>   |     |     |     |     |     |     |     |     |     |     |     |     |     |     |     | X   |     |     |     |     |
| <i>Hipposideros tephros</i>     |     |     |     |     |     |     |     |     |     |     |     |     |     |     |     |     |     |     |     | X   |
| <i>Triaenops parvus</i>         |     |     |     |     |     |     |     |     |     |     |     | X   |     |     |     |     |     |     |     | X   |
| <i>Triaenops persicus</i>       |     |     |     |     |     | X   |     |     |     |     |     | X   | X   |     |     |     |     |     | X   | X   |
| <b>Megadermatidae</b>           |     |     |     |     |     |     |     |     |     |     |     |     |     |     |     |     |     |     |     |     |
| <i>Megaderma lyra</i>           | X   |     |     |     |     |     |     |     |     |     |     |     | X   |     |     |     |     |     |     |     |
| <b>Miniopteridae</b>            |     |     |     |     |     |     |     |     |     |     |     |     |     |     |     |     |     |     |     |     |
| <i>Miniopterus natalensis</i>   |     |     |     |     |     |     |     |     |     |     |     |     |     |     |     | X   |     |     |     | X   |
| <i>Miniopterus schreibersii</i> | X   | X   | X   |     | X   |     |     | X   | X   |     | X   |     |     | X   |     |     | X   | X   |     |     |
| <b>Molossidae</b>               |     |     |     |     |     |     |     |     |     |     |     |     |     |     |     |     |     |     |     |     |
| <i>Chaerephon pumilus</i>       |     |     |     |     |     |     |     |     |     |     |     |     |     |     |     | X   |     |     |     | X   |
| <i>Mops midas</i>               |     |     |     |     |     |     |     |     |     |     |     |     |     |     |     | X   |     |     |     |     |

[illegible]

[illegible]

[illegible]

| Bat Species                    | AFG | ARM | AZE | BHR | GEO | IRN | IRQ | ISR | JOR | KWT | LBN | OMN | PAK | PSE | QAT | SAU | SYR | TUR | ARE | YEM |
|--------------------------------|-----|-----|-----|-----|-----|-----|-----|-----|-----|-----|-----|-----|-----|-----|-----|-----|-----|-----|-----|-----|
| <i>Pipistrellus rueppellii</i> |     |     |     |     |     |     | X   | X   |     |     |     |     |     |     |     |     |     |     |     | X   |
| <i>Pipistrellus tenuis</i>     | X   |     |     |     |     |     |     |     |     |     |     |     | X   |     |     |     |     |     |     |     |
| <i>Plecotus auritus</i>        |     |     | X   |     | X   | X   |     |     |     |     |     |     |     |     |     |     |     | X   |     |     |
| <i>Plecotus austriacus</i>     |     |     |     |     |     |     |     |     |     |     |     |     |     |     |     |     |     | X   |     |     |
| <i>Plecotus kolombatovici</i>  |     |     |     |     |     |     |     |     |     |     | X   |     |     |     |     |     |     | X   |     |     |
| <i>Plecotus macrobullaris</i>  |     | X   | X   |     | X   | X   |     |     |     |     |     |     |     |     |     |     | X   | X   |     |     |
| <i>Scotoecus pallidus</i>      |     |     |     |     |     |     |     |     |     |     |     |     | X   |     |     |     |     |     |     |     |
| <i>Scotophilus heathi</i>      | X   |     |     |     |     |     |     |     |     |     |     |     | X   |     |     |     |     |     |     |     |
| <i>Scotophilus kuhlii</i>      |     |     |     |     |     |     |     |     |     |     |     |     | X   |     |     |     |     |     |     |     |
| <i>Scotozous dormeri</i>       |     |     |     |     |     |     |     |     |     |     |     |     | X   |     |     |     |     |     |     |     |
| <i>Vespertilio murinus</i>     | X   | X   | X   |     | X   | X   |     |     |     |     |     |     |     |     |     |     |     | X   |     |     |

Species occurrences are based on data available from the International Union for Conservation of Nature (IUCN) Red List of Threatened Species (<https://www.iucnredlist.org/>), downloaded February 5, 2019. We included a species' presence in a country if categorized as extant, omitting species if presence is extinct, possibly extinct, possibly extant, or unknown.

Country abbreviations: AFG - Afghanistan; ARM - Armenia; AZE - Azerbaijan; BHR - Bahrain; GEO - Georgia; IRN - Iran; IRQ - Iraq; ISR - Israel; JOR - Jordan; KWT - Kuwait; LBN - Lebanon; OMN - Oman; QAT - Qatar; PAK - Pakistan; PSE - State of Palestine; SAU - Saudi Arabia; SYR - Syria; TUR - Turkey; ARE - United Arab Emirates; YEM - Yemen.
